# Supplementary material for: Taming the polysulphide shuttle in Li–S batteries by plasma-induced asymmetric functionalisation of the separator
Source: Royal Society of Chemistry journal article supplement (doi:10.1039/c5ra13197a), 2015-01-01
Supplement: c5ra13197a1.pdf [file c5ra13197a1.pdf]

## Supporting Information

Joanna Conder, Sigita Urbonaite, Daniel Streich, Petr Novák and Lorenz Gubler\*

### Normalisation of the ATR-FTIR spectra

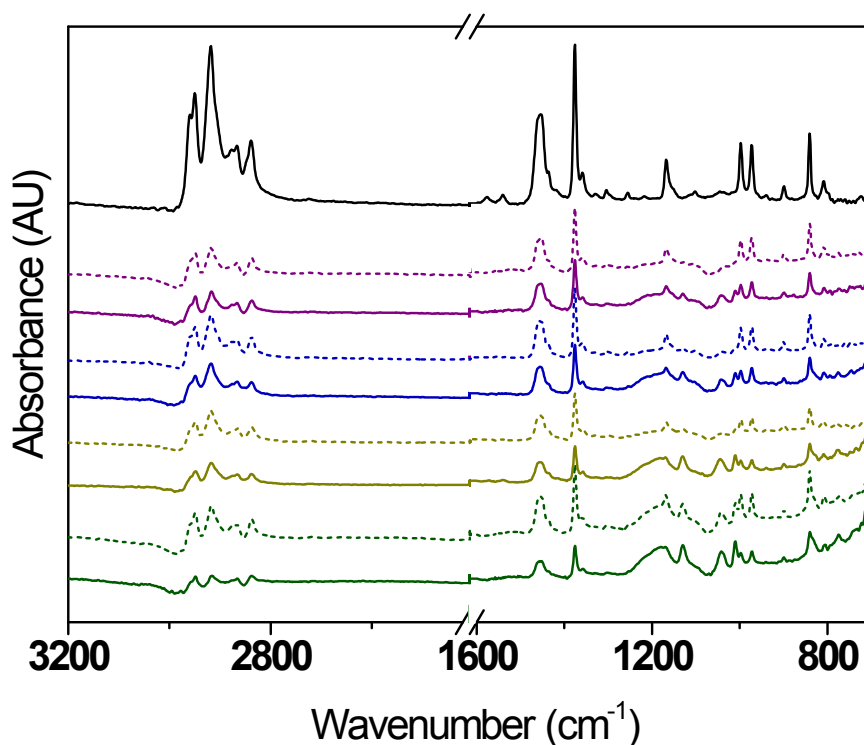

Fig. S1 ATR-FTIR spectra of pristine PP polymer (–) and multi-solvent-exchanged PP-*g*-PLiSS membranes with 3% (–, –), 6% (–, –), 29% (–, –) and 42% graft level (–, –). Dashed and solid lines refer to spectra obtained from unmodified and grafted membrane sides, respectively.

ATR-FTIR spectroscopy was used to confirm the grafting of styrene sulfonate (SS) at and near the surface of the PP films as well as the asymmetry of the PP-*g*-PLiSS membranes. The non-normalised spectra of both sides of the different membranes are shown in Fig. S1. Polypropylene has strong bands near 2950, 2800  $\text{cm}^{-1}$ , 1460  $\text{cm}^{-1}$ , and 1376  $\text{cm}^{-1}$  corresponding to various aliphatic C-H stretching and bending modes.<sup>1</sup> Additionally, bands of medium intensity are observed near 1155 and 970  $\text{cm}^{-1}$ . These signals can be assigned to  $-\text{CH}_3$  and  $-\text{CH}_2$  rocking and  $\text{CH}-\text{CH}_2$  and  $\text{CH}-\text{CH}_3$  stretching vibrations.<sup>2</sup> Comparing the pristine PP film with the grafted membranes, four new absorption peaks are observed between 1200 and 1000  $\text{cm}^{-1}$ . The signals at 1182 and 1044  $\text{cm}^{-1}$  are due to antisymmetric and symmetric vibrations of the SS groups whereas the signals observed at 1130 and 1011  $\text{cm}^{-1}$  originate from in-plane vibrations of the benzene ring.<sup>3</sup>

In order to follow the temporal development of the SS layer at and near the surface of PP as a function of the graft level, all spectra were shifted by their offset at  $2500\text{ cm}^{-1}$  and then normalised with respect to the height of the PP peak at  $1376\text{ cm}^{-1}$  to obtain the spectra in Fig. 4.

## Galvanostatic curves

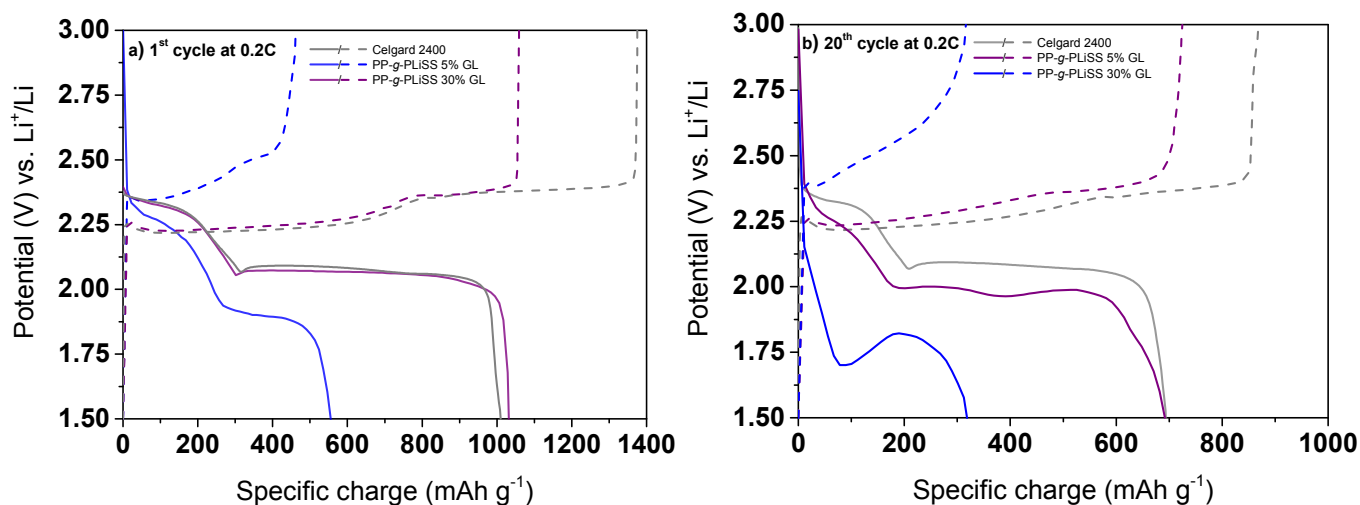

Fig. S2. Galvanostatic curves of the (a) first and (b) twentieth lithiation and delithiation for Li-S cells assembled with Celgard 2400 and 5 and 30% grafted PP-*g*-PLISS.

## References

1. L. Cernakova, D. Kovacik, A. Zahoranova, M. Cernak and M. Mazur, *Plasma Chemistry and Plasma Processing*, 2005, **25**, 427-437.
2. N. Othman, H. Ismail and M. Mariatti, *Polymer Degradation and Stability*, 2006, **91**, 1761-1774.
3. G. Zundel, *Hydration and Intermolecular Interaction: Infrared Investigations with Polyelectrolyte Membranes*, Elsevier Science, 2012.
